# Supplementary material for: Dehydration of n-butanol on phosphate-modified carbon nanotubes: active site and intrinsic catalytic activity
Source: Royal Society of Chemistry journal article supplement (doi:10.1039/d1cy00426c), 2021-01-01
Supplement: d1cy00426c1.pdf [file d1cy00426c1.pdf]

## **Supplementary Information:**

### **Dehydration of n-Butanol on Phosphate-Modified Carbon Nanotubes: Active Site and Intrinsic Catalytic Activity**

Fan Li<sup>a,b</sup>, Xueya Dai<sup>a,b</sup>, Xingyu Lu<sup>a,b</sup>, Chao Wang<sup>c</sup>, Wei Qi<sup>a,b\*</sup>

*<sup>a</sup> Shenyang National Laboratory for Materials Science, Institute of Metal Research, Chinese Academy of Sciences, Shenyang 110016, China.*

*<sup>b</sup> School of Materials Science and Engineering, University of Science and Technology of China, Shenyang 110016, China.*

*<sup>c</sup> School of Medical Devices, Shenyang Pharmaceutical University, No. 103, Wenhua Road, Shenyang 110016, China.*

\*Corresponding Author: E-mail: wqi@imr.ac.cn

#### **Catalyst characterizations**

The temperature-programmed desorption (TPD) measurement was carried out in He with Pfeiffer Omnistar mass spectrometer for online off-gas (CO: 28, CO<sub>2</sub>: 44) analysis. In a typical run, 75 mg catalyst was loaded in a fixed-bed quartz reactor with the inner diameter of 9 mm. Prior to temperature ramping, the weakly adsorbed water was removed in He (10 mL/min) flow at 120 °C for 2 h, and after that the reactor was heated at a rate of 5 °C/min to 900 °C. The ammonia temperature-programmed desorption (NH<sub>3</sub>-TPD) measurement was carried out in He with Pfeiffer Omnistar mass

spectrometer for online off gas ( $\text{NH}_3$ :16) analysis. In a typical run, 75 mg catalyst was loaded in a fixed-bed quartz reactor with the inner diameter of 9 mm. Prior to temperature ramping, the weakly adsorbed water was removed in He (40 mL/min) flow at 100 °C for 1 h, and then the catalyst was cooled down to 30 °C. 10% vol.  $\text{NH}_3$  with He balance (40 mL/min) was fed for 1 h. After adsorbing  $\text{NH}_3$ , pure He was fed (40 mL/min), and the sample was heated at 5 °C/min to 100 °C for 2 h to remove the physically adsorbed ammonia and then cooling down to the room temperature. At last, the system was heated at 5 °C/min to 600 °C, and the desorption product was monitored with the mass spectrometer. The TPD signals were fitted and deconvoluted using the PEAKFIT4.12 software.

The P 2p and O 1s X-ray Photoelectron Spectroscopy (XPS) spectra were measured by an ESCALAB 250 (Thermo VG, USA) set up with Al K $\alpha$  X-rays (1486.6 eV, 150 W, 50.0 eV pass energy). The P 2p and O 1s XPS spectra were fitted and deconvoluted using Gaussian-Lorentzian function after subtraction of a Shirley background using XPSPEAK41 software. The TEM measurements were performed on an aberration-corrected JEOL ARM 200CF microscope, and SAED and EDX (energy-dispersive x-ray) elemental mapping measurements were performed on the same TEM.

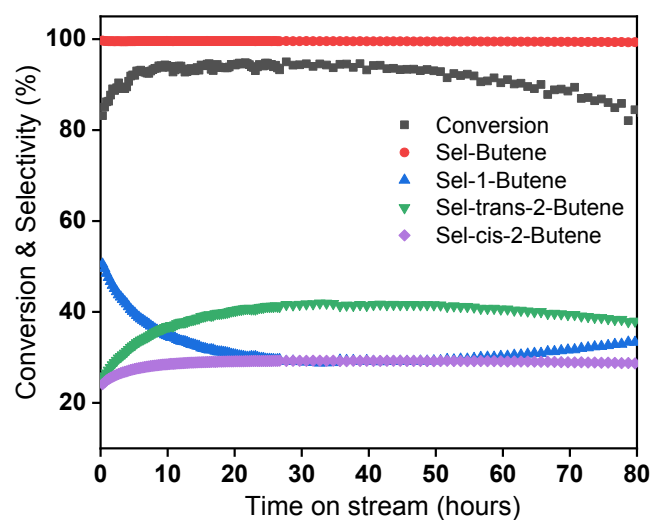

**Fig. S1.** Long-term catalytic performance of P-oCNT (5% weight) in nB conversion reactions (reaction conditions: 260 °C, 1.0 kPa nB, 18 mL/min total flow rate, He balance, 100 mg catalyst).

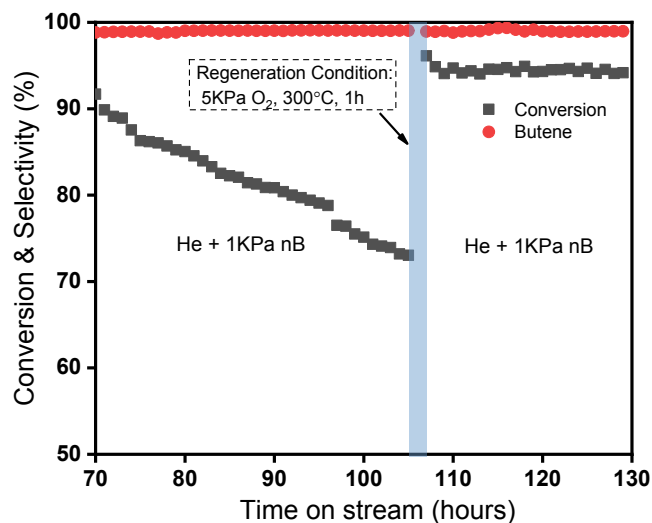

**Fig. S2.** Catalytic performance of P-oCNT (5% weight) during the regeneration process in nB conversion reactions (reaction conditions: 260 °C, 1.0 kPa nB, 18 mL/min total flow rate, He balance, 100 mg catalyst).

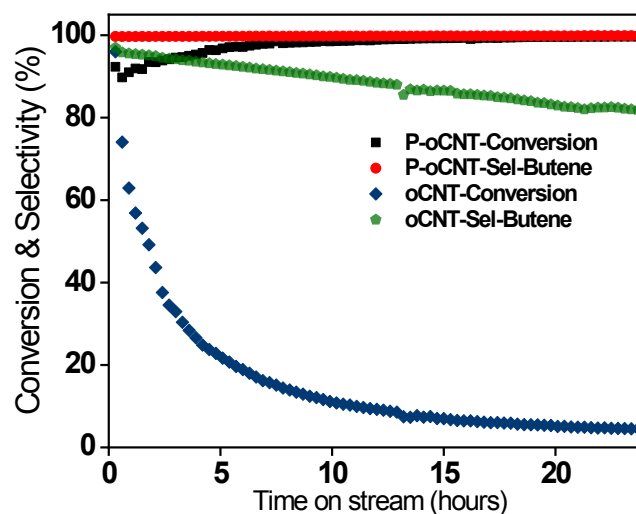

**Fig. S3.** Catalytic performance of P-oCNT (10% weight) and oCNT in nB dehydration reactions. nB conversion and butene selectivity as a function of reaction time (reaction condition: 260 °C, 1.0 kPa nB, 18 mL/min total flow rate, He balance, 100 mg catalyst).

**Table S1.** The catalytic activity and reaction condition of the P-oCNT and other catalysts in butanol dehydration reaction.

| Catalysts                                        | Weight (g) | Temperature (°C) | Conversion (%) | Butene Selectivity (%) | nB (KPa) | Pressure (bar) | Space Velocities (h <sup>-1</sup> ) | TO S (h) | Reference |
|--------------------------------------------------|------------|------------------|----------------|------------------------|----------|----------------|-------------------------------------|----------|-----------|
| S/ZrO <sub>2</sub>                               | 0.5        | 200              | 59.8           | 94.5                   | -        | 1              | 0.031                               | 0.5      | 1         |
| AM-11                                            | 0.05       | 250              | 100            | 100                    | -        | 1              | 2                                   | 20       | 2         |
| nano-HZSM5                                       | 0.2        | 240              | 54             | 78                     | 29       | 5              | -                                   | 50       | 3         |
| γ-Al <sub>2</sub> O <sub>3</sub>                 | 0.01       | 240              | 62             | 23                     | 29       | 5              | -                                   | 50       | 4         |
| AlPO <sub>4</sub>                                | 0.1        | 275              | 54             | 47                     | 2.6      | 1              | 1.3                                 | 12       |           |
| AlPON                                            | 0.1        | 275              | 48             | 43                     | 2.6      | 1              | 1.3                                 | 12       |           |
| SiO <sub>2</sub> -Al <sub>2</sub> O <sub>3</sub> | 0.1        | 275              | 100            | 100                    | 2.6      | 1              | 1.3                                 | -        | 5         |
| H <sub>3</sub> PW <sub>12</sub> O <sub>40</sub>  | 0.18       | 300              | 70             | 99                     | 10       | 1              | -                                   | 10       |           |
| P-oCNT                                           | 0.1        | 260              | 94             | 99                     | 1        | 1              | 0.33                                | 60       | This work |

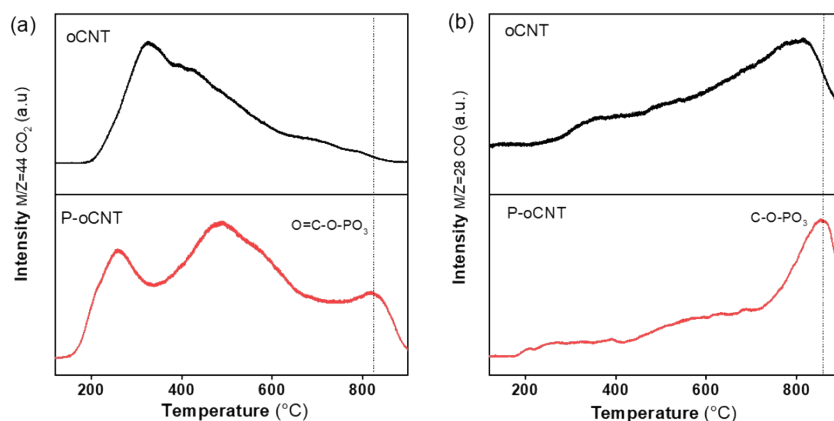

**Fig. S4.** Amount of CO<sub>2</sub> (a) and CO (b) evolved as a function of temperature during the TPD experiment for oCNT and P-oCNT before reaction (TPD condition: 75 mg catalysts, 10 mL/min He, heating rate: 5 °C min<sup>-1</sup>, 120-900 °C).

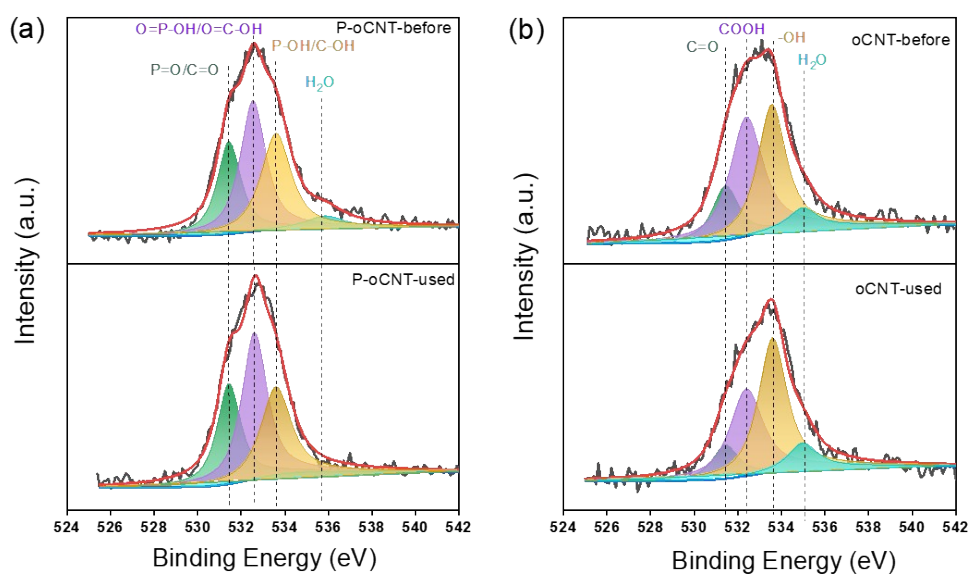

**Fig. S5.** O1s XPS of (a) P-oCNT and (b) oCNT before and after nB dehydration reactions.

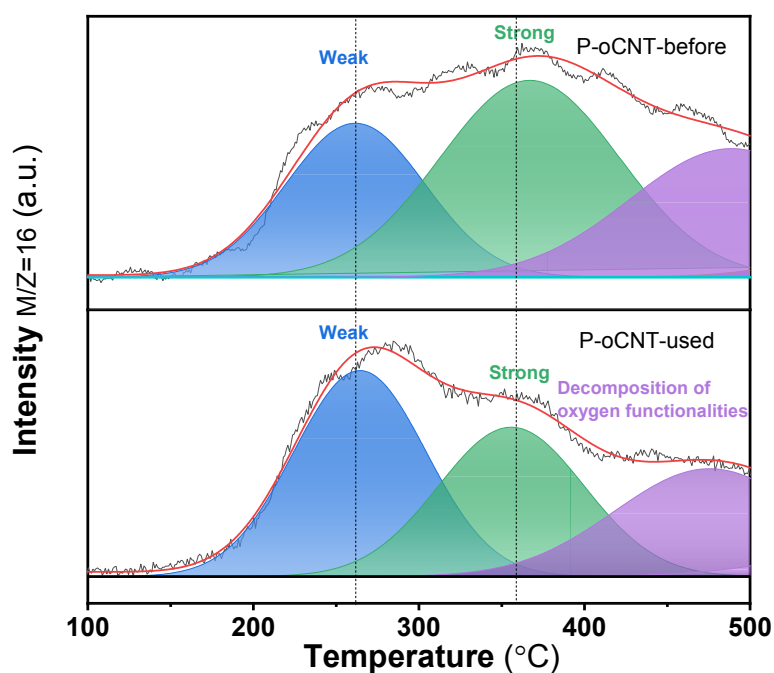

**Fig. S6.** NH<sub>3</sub>-TPD profiles of P-oCNT before and after nB dehydration reactions and the corresponding peak deconvolution results.

**Table S2.** P 2p XPS analysis results of P-oCNT and P-SiO<sub>2</sub> catalysts (before and after nB conversion reactions).

| Sample                     | P (at%) | Amount (mmol/g) | PP% | MP% | PP/MP |
|----------------------------|---------|-----------------|-----|-----|-------|
| P-oCNT-before              | 1.50    | 1.23            | 35  | 65  | 0.54  |
| P-oCNT-used                | 0.96    | 0.79            | 56  | 44  | 1.27  |
| P-SiO <sub>2</sub> -before | 1.64    | -               | 32  | 68  | 0.46  |
| P-SiO <sub>2</sub> -used   | 1.04    | -               | 79  | 21  | 3.66  |

**Table S3.** O1s XPS analysis results of oCNT and P-oCNT catalysts (before and after nB conversion reactions).

| Sample        | O(at%) | C=O(P=O) % | COOH(POOH)% | C-OH(P-OH)% | H <sub>2</sub> O% | -OOH/OH |
|---------------|--------|------------|-------------|-------------|-------------------|---------|
| oCNT-before   | 4.7    | 15         | 42          | 38          | 5                 | 1.10    |
| oCNT-used     | 3.4    | 11         | 35          | 46          | 8                 | 0.76    |
| P-oCNT-before | 5.9    | 25         | 38          | 33          | 5                 | 1.16    |
| P-oCNT-used   | 4.8    | 27         | 42          | 30          | 0                 | 1.41    |

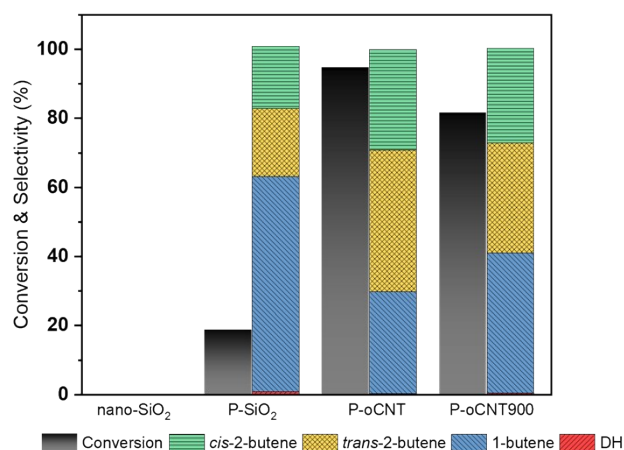

**Fig. S7.** Catalytic performance of different catalysts (reaction conditions: 260 °C, 1.0 kPa nB, 18 mL/min total flow rate, He balance, 100 mg catalyst).

#### References

1. Y. S. Hsu, Y. L. Wang and A. N. Ko, *Journal of the Chinese Chemical Society*, 2013, **56**, 314-322.
2. P. Brandão, A. Philippou, J. Rocha and M. W. Anderson, *Catalysis Letters*, 2002, **80**, 99-102.
3. A. de Reviere, T. Vandevyvere, M. K. Sabbe and A. Verberckmoes, *Catalysts*, 2020, **10**, 879.
4. S. Delsarte and P. Grange, *Applied Catalysis A: General*, 2004, **259**, 269-279.
5. C. Lang, J. Schnee, B. J. Takam Mba, F. Devred and E. M. Gaigneaux, *Catalysis Science & Technology*, 2020, **10**, 6244-6256.
